# Supplementary material for: Multi-Omics Analysis of SOX4, SOX11, and SOX12 Expression and the Associated Pathways in Human Cancers
Source: MDPI journal article supplement (doi:10.3390/jpm11080823), 2021-08-23
Supplement: s1 [file s1]

# Supplementary information: Multi-omics Analysis of SOX4, SOX11, and SOX12 Expression and the Associated Pathways in Human Cancers

**Jaekwon Seok <sup>1,†</sup>, Minchan Gil <sup>1,†</sup>, Ahmed Abdal Dayem <sup>1</sup>, Subbroto Kumar Saha <sup>1</sup>  
and Ssang-Goo Cho <sup>1,\*</sup>**

<sup>1</sup> Department of Stem Cell and Regenerative Biotechnology, Molecular & Cellular Reprogramming Center (MCRC), Incurable Disease Animal Model & Stem Cell Institute (IDASI), Konkuk University, 120 Neungdong-ro, Gwangjin-gu, Seoul 05029, Korea; tjrwornjs@naver.com (J.S.); minchangil@gmail.com (M.G.); ahmed\_morsy86@yahoo.com (A.A.D.); subbroto@konkuk.ac.kr (S.K.S.);

\* Correspondence: ssangoo@konkuk.ac.kr; Tel.: +82-2-450-4207 or +82-2-444-4207

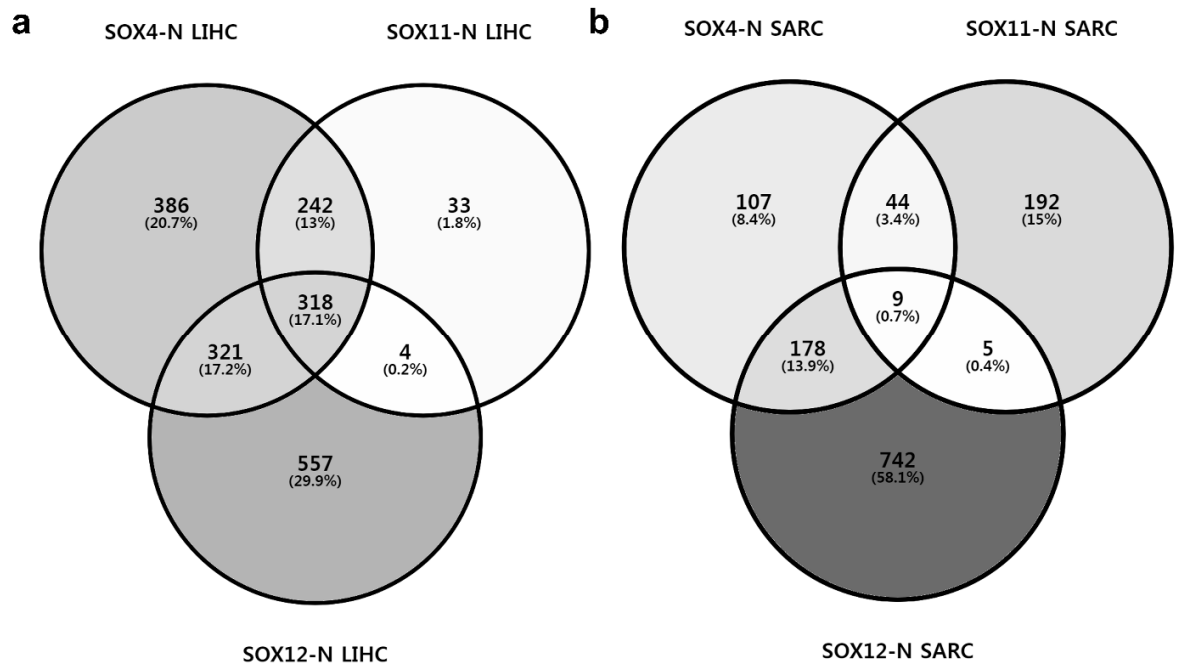

**Supplementary Figure S1.** Analysis of negatively correlated genes of SOX4, SOX11, and SOX12 (a) Venn diagram of negatively correlated genes with three SOX genes using TCGA-LIHC transcriptome datasets from R2 database. (b) Venn diagram of negatively correlated genes with three SOX genes using TCGA-SARC transcriptome datasets from R2 database.

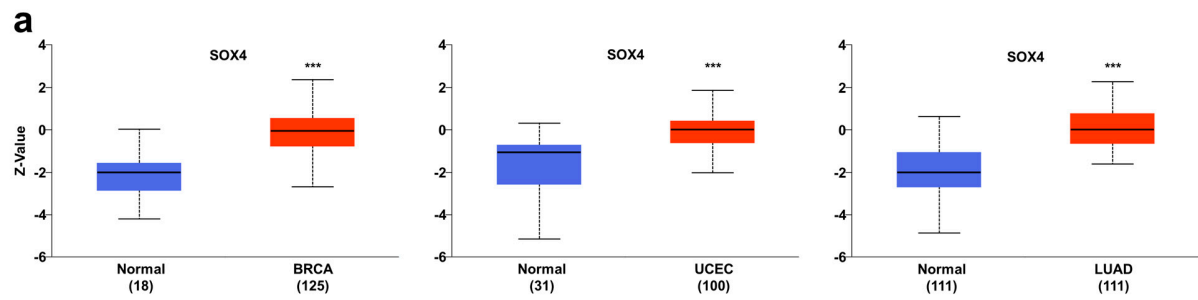

**Supplementary Figure S2.** Protein expression profile of SOX4 in various types of cancers and their adjacent normal tissues. (a) Box plot of protein expression level of SOX4 in BRCA, UCEC, and LUAD (plotted in red) and adjacent normal tissues (plotted in blue). (\*\*\*:  $p < 0.0001$ ). BRCA: breast carcinoma; UCEC: uterine corpus endometrial carcinoma.

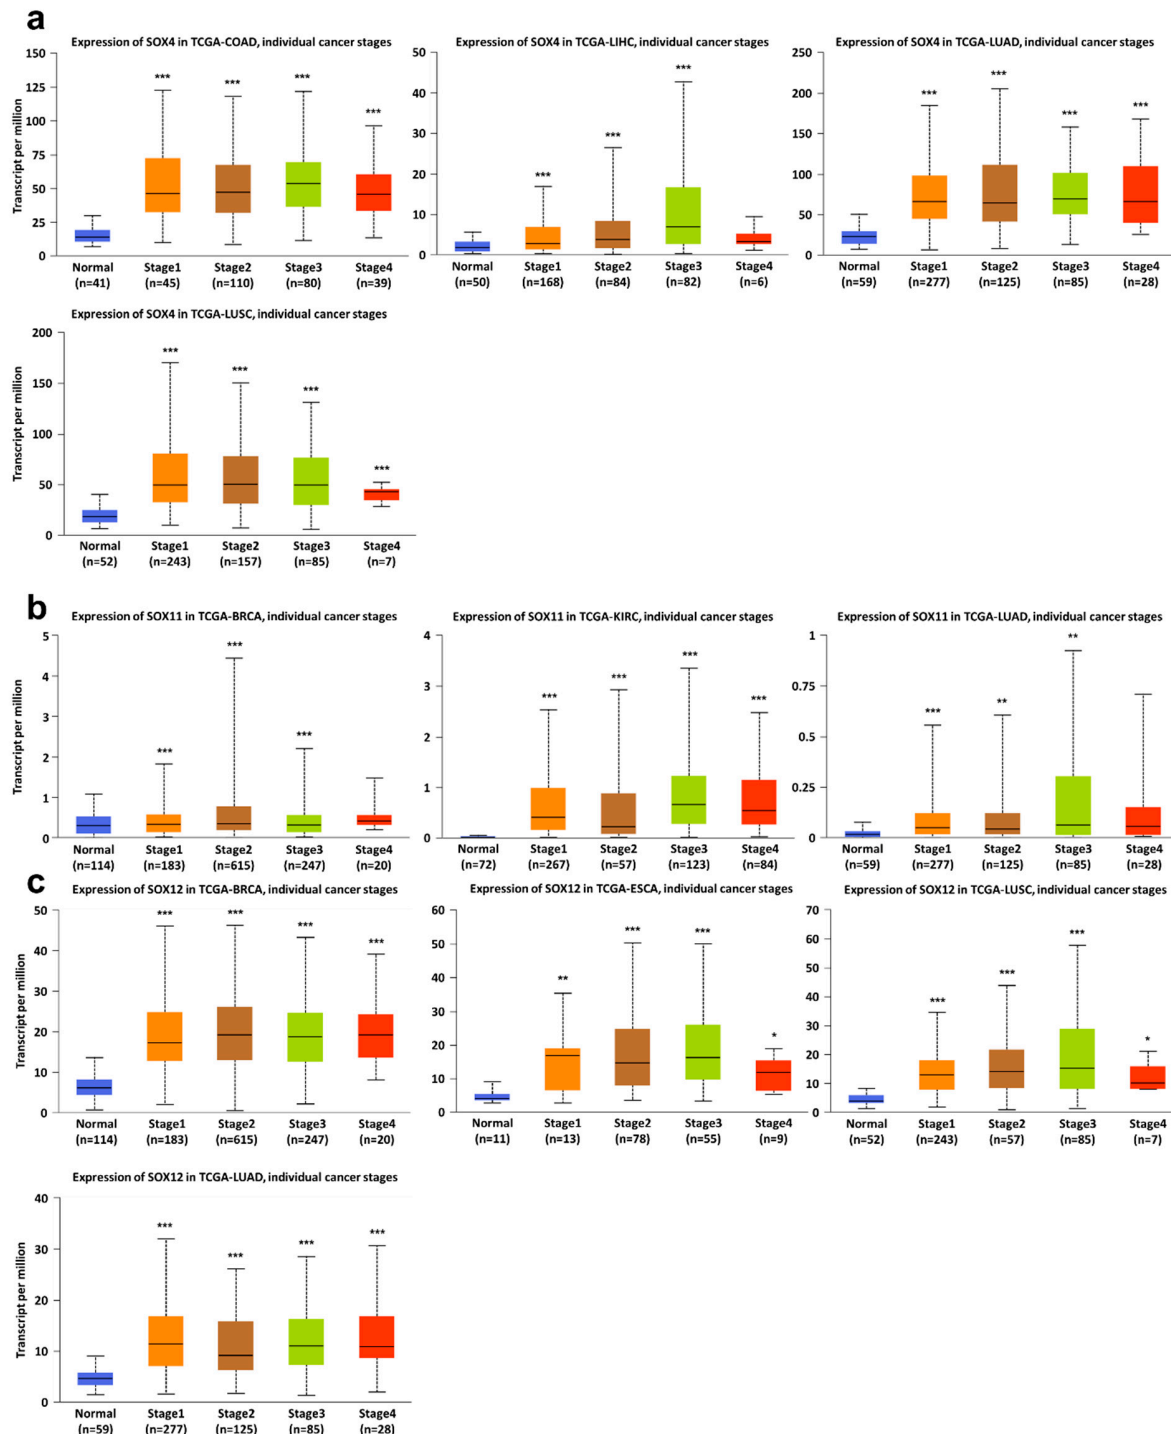

**Supplementary Figure S3.** mRNA expression level of SOX4, SOX11, and SOX12 in multiple cancer types. (a) expression level of SOX4 in COAD, LIHC, LUAD, and LUSC according to the stage of cancer compared to adjacent normal tissues. (b) expression level of SOX11 in BRCA, KIRC, and LUAD according to the stage of cancer compared to adjacent normal tissues. (c) expression level of SOX12 in BRCA, ESCA, LUAD, and LUSC according to the stage of cancer compared to adjacent normal tissues (\*:  $p < 0.05$ ; \*\*:  $p < 0.01$ ; \*\*\*:  $p < 0.001$ ).

**a**

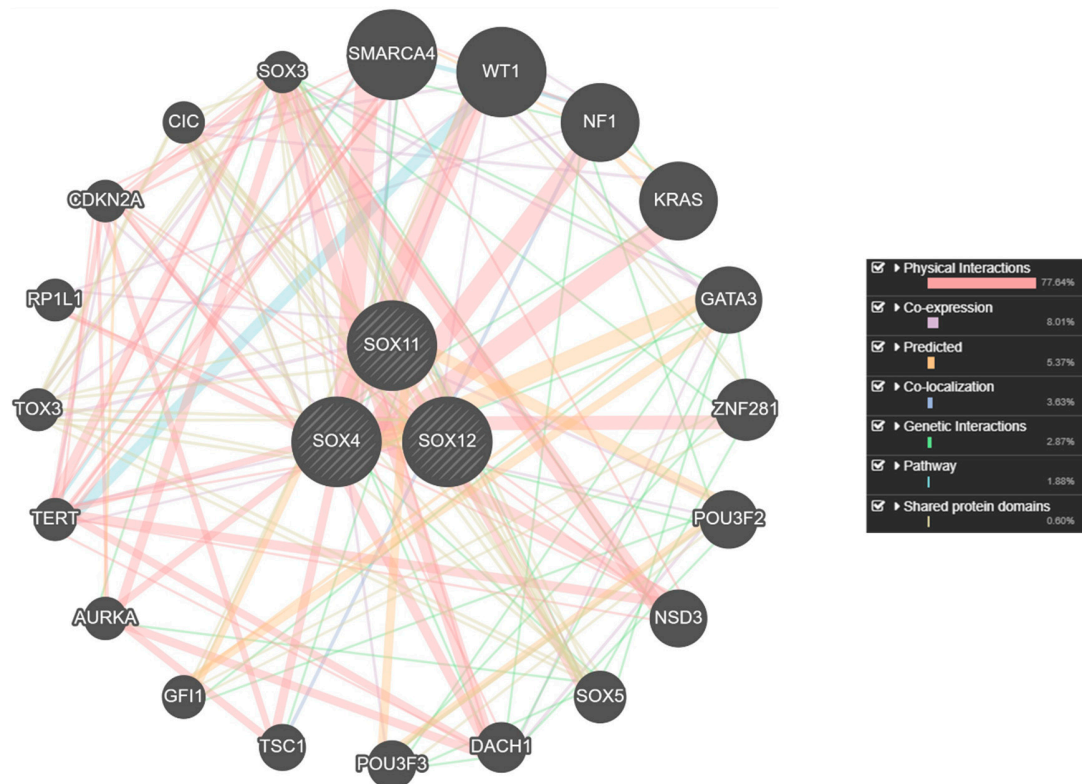

**Supplementary Figure S4.** gene network analysis with SOX4, SOX11, and SOX12 using GeneMANIA database. (a) Line thickness indicates the intensity of interaction. The line color demonstrates the interaction categories including physical interactions, co-expression, predicted, co-localization, genetic interactions, pathway, and shared protein domains.

**Supplementary Table S1.** The Reactome pathway analysis of negatively correlated genes with three SOX genes using LIHC-TCGA transcriptome datasets.

| Pathway identifier | Pathway name                                                                  | Entities p-Value |
|--------------------|-------------------------------------------------------------------------------|------------------|
| R-HSA-1430728      | Metabolism                                                                    | 1.11E-16         |
| R-HSA-9033241      | Peroxisomal protein import                                                    | 4.02E-14         |
| R-HSA-211859       | Biological oxidations                                                         | 1.08E-12         |
| R-HSA-211945       | Phase I - Functionalization of compounds                                      | 2.70E-11         |
| R-HSA-9609507      | Protein localization                                                          | 4.31E-11         |
| R-HSA-8978868      | Fatty acid metabolism                                                         | 1.18E-09         |
| R-HSA-556833       | Metabolism of lipids                                                          | 5.67E-09         |
| R-HSA-71291        | Metabolism of amino acids and derivatives                                     | 6.00E-09         |
| R-HSA-211979       | Eicosanoids                                                                   | 4.14E-07         |
| R-HSA-211935       | Fatty acids                                                                   | 1.24E-06         |
| R-HSA-211897       | Cytochrome P450 - arranged by substrate type                                  | 2.53E-06         |
| R-HSA-390918       | Peroxisomal lipid metabolism                                                  | 5.80E-06         |
| R-HSA-71384        | Ethanol oxidation                                                             | 1.08E-05         |
| R-HSA-1989781      | PPARA activates gene expression                                               | 1.80E-05         |
| R-HSA-400206       | Regulation of lipid metabolism by PPARalpha                                   | 2.06E-05         |
| R-HSA-389661       | Glyoxylate metabolism and glycine degradation                                 | 2.46E-05         |
| R-HSA-177128       | Conjugation of salicylate with glycine                                        | 7.15E-05         |
| R-HSA-9657689      | Defective SERPING1 causes hereditary angioedema                               | 7.38E-05         |
| R-HSA-70895        | Branched-chain amino acid catabolism                                          | 1.66E-04         |
| R-HSA-193368       | Synthesis of bile acids and bile salts via 7alpha-hydroxycholesterol          | 2.03E-04         |
| R-HSA-140837       | Intrinsic Pathway of Fibrin Clot Formation                                    | 2.58E-04         |
| R-HSA-194068       | Bile acid and bile salt metabolism                                            | 3.97E-04         |
| R-HSA-156587       | Amino Acid conjugation                                                        | 4.59E-04         |
| R-HSA-159424       | Conjugation of carboxylic acids                                               | 4.59E-04         |
| R-HSA-390247       | Beta-oxidation of very long chain fatty acids                                 | 5.40E-04         |
| R-HSA-5365859      | RA biosynthesis pathway                                                       | 6.17E-04         |
| R-HSA-140877       | Formation of Fibrin Clot (Clotting Cascade)                                   | 6.74E-04         |
| R-HSA-9614085      | FOXO-mediated transcription                                                   | 7.21E-04         |
| R-HSA-211958       | Miscellaneous substrates                                                      | 7.76E-04         |
| R-HSA-9033500      | TYSND1 cleaves peroxisomal proteins                                           | 0.001270915      |
| R-HSA-2142753      | Arachidonic acid metabolism                                                   | 0.001579895      |
| R-HSA-9024446      | NR1H2 and NR1H3-mediated signaling                                            | 0.001940267      |
| R-HSA-9615017      | FOXO-mediated transcription of oxidative stress, metabolic and neuronal genes | 0.001958166      |

|               |                                                                                   |             |
|---------------|-----------------------------------------------------------------------------------|-------------|
| R-HSA-2142816 | Synthesis of (16-20)-hydroxyeicosatetraenoic acids (HETE)                         | 0.001984323 |
| R-HSA-8963684 | Tyrosine catabolism                                                               | 0.001984323 |
| R-HSA-9651496 | Defects of contact activation system (CAS) and kallikrein/kinin system (KKS)      | 0.002363724 |
| R-HSA-9671793 | Diseases of hemostasis                                                            | 0.002363724 |
| R-HSA-2161517 | Abacavir transmembrane transport                                                  | 0.002389212 |
| R-HSA-3371599 | Defective HLCS causes multiple carboxylase deficiency                             | 0.002389212 |
| R-HSA-5579029 | Metabolic disorders of biological oxidation enzymes                               | 0.002396801 |
| R-HSA-2142691 | Synthesis of Leukotrienes (LT) and Eoxins (EX)                                    | 0.00262302  |
| R-HSA-192105  | Synthesis of bile acids and bile salts                                            | 0.002811605 |
| R-HSA-432030  | Transport of glycerol from adipocytes to the liver by Aquaporins                  | 0.002874212 |
| R-HSA-159418  | Recycling of bile acids and salts                                                 | 0.003040886 |
| R-HSA-5362517 | Signaling by Retinoic Acid                                                        | 0.003066134 |
| R-HSA-156580  | Phase II - Conjugation of compounds                                               | 0.003555906 |
| R-HSA-1614635 | Sulfur amino acid metabolism                                                      | 0.003559625 |
| R-HSA-77111   | Synthesis of Ketone Bodies                                                        | 0.003795718 |
| R-HSA-3323169 | Defects in biotin (Btn) metabolism                                                | 0.003974202 |
| R-HSA-76005   | Response to elevated platelet cytosolic Ca <sup>2+</sup>                          | 0.004965026 |
| R-HSA-9657688 | Defective factor XII causes hereditary angioedema                                 | 0.005023115 |
| R-HSA-8957322 | Metabolism of steroids                                                            | 0.005145457 |
| R-HSA-8963691 | Phenylalanine and tyrosine metabolism                                             | 0.005689156 |
| R-HSA-71032   | Propionyl-CoA catabolism                                                          | 0.00607555  |
| R-HSA-177135  | Conjugation of benzoate with glycine                                              | 0.00607555  |
| R-HSA-74182   | Ketone body metabolism                                                            | 0.006488823 |
| R-HSA-77289   | Mitochondrial Fatty Acid Beta-Oxidation                                           | 0.006776481 |
| R-HSA-1369062 | ABC transporters in lipid homeostasis                                             | 0.007318421 |
| R-HSA-9018682 | Biosynthesis of maresins                                                          | 0.007318421 |
| R-HSA-9029569 | NR1H3 & NR1H2 regulate gene expression linked to cholesterol transport and efflux | 0.008137183 |
| R-HSA-166658  | Complement cascade                                                                | 0.008456402 |
| R-HSA-389887  | Beta-oxidation of pristanoyl-CoA                                                  | 0.00918079  |
| R-HSA-114608  | Platelet degranulation                                                            | 0.01050252  |
| R-HSA-8964540 | Alanine metabolism                                                                | 0.010923388 |
| R-HSA-5679090 | Defective ABCG8 causes gallbladder disease 4 and sitosterolemia                   | 0.010923388 |
| R-HSA-5679096 | Defective ABCG5 causes sitosterolemia                                             | 0.010923388 |
| R-HSA-5668914 | Diseases of metabolism                                                            | 0.01166481  |
| R-HSA-2161522 | Abacavir transport and metabolism                                                 | 0.012511894 |

|               |                                                                                             |             |
|---------------|---------------------------------------------------------------------------------------------|-------------|
| R-HSA-196780  | Biotin transport and metabolism                                                             | 0.013816394 |
| R-HSA-8963899 | Plasma lipoprotein remodeling                                                               | 0.014149649 |
| R-HSA-211981  | Xenobiotics                                                                                 | 0.014481606 |
| R-HSA-174824  | Plasma lipoprotein assembly, remodeling, and clearance                                      | 0.01512893  |
| R-HSA-382556  | ABC-family proteins mediated transport                                                      | 0.015528391 |
| R-HSA-196849  | Metabolism of water-soluble vitamins and cofactors                                          | 0.017387467 |
| R-HSA-5661270 | Formation of xylulose-5-phosphate                                                           | 0.017965672 |
| R-HSA-6798163 | Choline catabolism                                                                          | 0.017965672 |
| R-HSA-9027307 | Biosynthesis of maresin-like SPMs                                                           | 0.017965672 |
| R-HSA-2408508 | Metabolism of ingested SeMet, Sec, MeSec into H <sub>2</sub> Se                             | 0.019609123 |
| R-HSA-400253  | Circadian Clock                                                                             | 0.02016351  |
| R-HSA-2142670 | Synthesis of epoxy (EET) and dihydroxyeicosatrienoic acids (DHET)                           | 0.022733501 |
| R-HSA-5579026 | Defective CYP11A1 causes Adrenal insufficiency, congenital, with 46,XY sex reversal (AICSR) | 0.023359471 |
| R-HSA-196854  | Metabolism of vitamins and cofactors                                                        | 0.024212916 |
| R-HSA-3296482 | Defects in vitamin and cofactor metabolism                                                  | 0.024852799 |
| R-HSA-1368108 | BMAL1:CLOCK,NPAS2 activates circadian gene expression                                       | 0.024852799 |
| R-HSA-9616334 | Defective Base Excision Repair Associated with NEIL1                                        | 0.025632703 |
| R-HSA-193775  | Synthesis of bile acids and bile salts via 24-hydroxycholesterol                            | 0.026770851 |
| R-HSA-2395516 | Electron transport from NADPH to Ferredoxin                                                 | 0.028356422 |
| R-HSA-8949275 | RUNX3 Regulates Immune Response and Cell Migration                                          | 0.028356422 |
| R-HSA-977606  | Regulation of Complement cascade                                                            | 0.030496245 |
| R-HSA-2046106 | alpha-linolenic acid (ALA) metabolism                                                       | 0.030866342 |
| R-HSA-3322077 | Glycogen synthesis                                                                          | 0.031048097 |
| R-HSA-5652084 | Fructose metabolism                                                                         | 0.034127685 |
| R-HSA-947581  | Molybdenum cofactor biosynthesis                                                            | 0.034127685 |
| R-HSA-2855086 | Ficolins bind to repetitive carbohydrate structures on the target cell surface              | 0.039482963 |
| R-HSA-916853  | Degradation of GABA                                                                         | 0.039482963 |
| R-HSA-5423646 | Aflatoxin activation and detoxification                                                     | 0.040106927 |
| R-HSA-189445  | Metabolism of porphyrins                                                                    | 0.043294687 |
| R-HSA-211999  | CYP2E1 reactions                                                                            | 0.044274267 |
| R-HSA-8963889 | Assembly of active LPL and LIPC lipase complexes                                            | 0.044274267 |
| R-HSA-9006931 | Signaling by Nuclear Receptors                                                              | 0.046346114 |



**Supplementary Table S2.** The Reactome pathway analysis of negatively correlated genes with three SOX genes using SARC-TCGA transcriptome datasets.

| Pathway identifier | Pathway name                                                                                | Entities p-Value |
|--------------------|---------------------------------------------------------------------------------------------|------------------|
| R-HSA-8863678      | Neurodegenerative Diseases                                                                  | 3.21E-04         |
| R-HSA-8862803      | Deregulated CDK5 triggers multiple neurodegenerative pathways in Alzheimer's disease models | 3.21E-04         |
| R-HSA-9645723      | Diseases of programmed cell death                                                           | 3.65E-04         |
| R-HSA-9615017      | FOXO-mediated transcription of oxidative stress, metabolic and neuronal genes               | 8.49E-04         |
| R-HSA-168256       | Immune System                                                                               | 0.001064552      |
| R-HSA-936837       | Ion transport by P-type ATPases                                                             | 0.001762662      |
| R-HSA-8950505      | Gene and protein expression by JAK-STAT signaling after Interleukin-12 stimulation          | 0.001861506      |
| R-HSA-9020591      | Interleukin-12 signaling                                                                    | 0.002451274      |
| R-HSA-447115       | Interleukin-12 family signaling                                                             | 0.003182541      |
| R-HSA-1280215      | Cytokine Signaling in Immune system                                                         | 0.0039805        |
| R-HSA-9614085      | FOXO-mediated transcription                                                                 | 0.004149368      |
| R-HSA-6798695      | Neutrophil degranulation                                                                    | 0.007825043      |
| R-HSA-909733       | Interferon alpha/beta signaling                                                             | 0.011422393      |
| R-HSA-9020558      | Interleukin-2 signaling                                                                     | 0.012332974      |
| R-HSA-983712       | Ion channel transport                                                                       | 0.013999915      |
| R-HSA-351200       | Interconversion of polyamines                                                               | 0.01408332       |
| R-HSA-391160       | Signal regulatory protein family interactions                                               | 0.015830803      |
| R-HSA-449147       | Signaling by Interleukins                                                                   | 0.01700624       |
| R-HSA-1614517      | Sulfide oxidation to sulfate                                                                | 0.019317195      |
| R-HSA-877300       | Interferon gamma signaling                                                                  | 0.020288412      |
| R-HSA-451927       | Interleukin-2 family signaling                                                              | 0.040850135      |
| R-HSA-1614558      | Degradation of cysteine and homocysteine                                                    | 0.04595268       |
| R-HSA-913531       | Interferon Signaling                                                                        | 0.046636296      |

**Supplementary Table S3.** Accession numbers of the SOX protein sequences (NCBI).

| <b>Gene symbol</b> | <b>Protein Accession Number</b> |
|--------------------|---------------------------------|
| SOX1               | EAX09158.1                      |
| SOX2               | EAW78354.1                      |
| SOX3               | AAF73059.1                      |
| SOX4               | EAW55429.1                      |
| SOX5               | P35711.3                        |
| SOX6               | P35712.3                        |
| SOX7               | Q9BT81.1                        |
| SOX8               | P57073.1                        |
| SOX9               | P48436.1                        |
| SOX10              | P56693.1                        |
| SOX11              | P35716.2                        |
| SOX12              | O15370.2                        |
| SOX13              | Q9UN79.3                        |
| SOX14              | O95416.1                        |
| SOX15              | O60248.1                        |
| SOX17              | Q9H6I2.1                        |
| SOX18              | P35713.2                        |
| SOX21              | Q9Y651.1                        |
| SOX30              | O94993.1                        |
| SRY                | AFG33955.1                      |
